# Supplementary material for: Discomfort relief after paracetamol administration in febrile children admitted to a third level paediatric emergency department
Source: PubMed Central journal article supplement (PMC10034175; doi:10.3389/fped.2023.1075449), 2023-03-09
Supplement: Datasheet1.pdf [file Datasheet1.pdf]

**Appendix 1:** Grid used for the assessment of every child included in the study.

|                                              |                     |
|----------------------------------------------|---------------------|
| Patient's code                               | Ethnic group        |
| Age                                          | Place of birth      |
| Sex                                          | Origins of parents  |
| Breath frequency                             | Admission diagnosis |
| Heart rate                                   | Discharge dimission |
| Drugs administrered in the previous 12 hours |                     |
| Body temperature at the entrance             | Type of thermomiter |
| Body temperature after 1 hour                |                     |

|                                        | Admission |  |          |  |      |  | After 1 hour |  |          |  |      |  |
|----------------------------------------|-----------|--|----------|--|------|--|--------------|--|----------|--|------|--|
|                                        | Less      |  | As usual |  | More |  | Less         |  | As usual |  | More |  |
| <b>Variations of Sleep-Wake Rhythm</b> |           |  |          |  |      |  |              |  |          |  |      |  |
| Delayed sleep phase                    |           |  |          |  |      |  |              |  |          |  |      |  |
| Early sleep phase                      |           |  |          |  |      |  |              |  |          |  |      |  |
| Night awakenings                       |           |  |          |  |      |  |              |  |          |  |      |  |
| <b>Appetite Variations</b>             |           |  |          |  |      |  |              |  |          |  |      |  |
| Reduced appetite                       |           |  |          |  |      |  |              |  |          |  |      |  |
| Reduced liquid intake                  |           |  |          |  |      |  |              |  |          |  |      |  |
| <b>Variation in Motor Activity</b>     |           |  |          |  |      |  |              |  |          |  |      |  |
| Increased complain                     |           |  |          |  |      |  |              |  |          |  |      |  |
| Restlessness                           |           |  |          |  |      |  |              |  |          |  |      |  |
| Weeknes                                |           |  |          |  |      |  |              |  |          |  |      |  |
| Fatigue                                |           |  |          |  |      |  |              |  |          |  |      |  |
| <b>Change in Mood</b>                  |           |  |          |  |      |  |              |  |          |  |      |  |
| Irritability                           |           |  |          |  |      |  |              |  |          |  |      |  |
| Anger                                  |           |  |          |  |      |  |              |  |          |  |      |  |
| Weeping                                |           |  |          |  |      |  |              |  |          |  |      |  |
| <b>Variation in Daily Habits</b>       |           |  |          |  |      |  |              |  |          |  |      |  |
| Play reduction                         |           |  |          |  |      |  |              |  |          |  |      |  |
| Reduction in showing interests         |           |  |          |  |      |  |              |  |          |  |      |  |
| Seeking comfort                        |           |  |          |  |      |  |              |  |          |  |      |  |
| Uncooperative                          |           |  |          |  |      |  |              |  |          |  |      |  |
| <b>Variation of Facial Expression</b>  |           |  |          |  |      |  |              |  |          |  |      |  |
| Changed Look                           |           |  |          |  |      |  |              |  |          |  |      |  |
| Clenched teeth                         |           |  |          |  |      |  |              |  |          |  |      |  |
| Curled lips                            |           |  |          |  |      |  |              |  |          |  |      |  |
| Wrinkled forehead                      |           |  |          |  |      |  |              |  |          |  |      |  |
| Paleness/colour change                 |           |  |          |  |      |  |              |  |          |  |      |  |
| <b>Other Signals</b>                   |           |  |          |  |      |  |              |  |          |  |      |  |
| Tachypnoea                             |           |  |          |  |      |  |              |  |          |  |      |  |
| Chills                                 |           |  |          |  |      |  |              |  |          |  |      |  |
| Widespread pain                        |           |  |          |  |      |  |              |  |          |  |      |  |

Type of antipyretic \_\_\_\_\_  
 Posology \_\_\_\_\_  
 Method of administration (Dose/kg) \_\_\_\_\_  
 Vomit in the following hour \_\_\_\_\_  
 Defecation after rectal administration \_\_\_\_\_  
 Other drugs \_\_\_\_\_  
 Other therapeutic or diagnostic maneuvers \_\_\_\_\_

Weight \_\_\_\_\_

Which expression reflects more the one of the child at the entrance?

Which expression reflects more the one of the child after 1 hour?

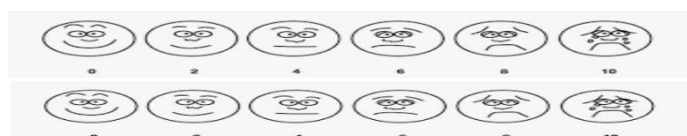

**Appendix 2:** comparison of demographic and clinical characteristics of children with severe and less severe discomfort.

| Characteristic                           | Important Discomfort | Not important discomfort | P   |
|------------------------------------------|----------------------|--------------------------|-----|
| <b>Age (n;%)</b>                         |                      |                          |     |
| 0-24                                     | 15 (62,5%)           | 94 (63,5%)               | 0,9 |
| 25-36                                    | 1 (4,2%)             | 12 (8,2%)                |     |
| >37                                      | 8 (33,3%)            | 42 (28,4%)               |     |
| <b>Sex (n;%)</b>                         |                      |                          |     |
| F                                        | 10 (41,7%)           | 71(48,0%)                | 0,6 |
| M                                        | 14 (58,3%)           | 77(52,0%)                |     |
| <b>Ethnic group (n;%)</b>                |                      |                          |     |
| Caucasian                                | 22 (91,7%)           | 126 (85,2%)              | 0,4 |
| Afro-American                            | 1 (4,2%)             | 6 (4,1%)                 |     |
| Asian                                    | 1 (4,2%)             | 6 (4,1%)                 |     |
| South-American                           | 0 (0,0%)             | 10 (6,8%)                |     |
| <b>Body temperature at T0 (°C)</b>       |                      |                          |     |
| Median °C                                | 39                   | 38,8                     | 0,4 |
| IQR °C                                   | 38,5-39,9            | 38,3-39,3                |     |
| <b>Body temperature at T60 (°C)</b>      |                      |                          |     |
| Median °C                                | 36,8                 | 36,8                     | 0,3 |
| IQR °C                                   | 36,3-37,3            | 36,4-37,5                |     |
| <b>Variation of body temperature</b>     |                      |                          |     |
| Median °C                                | 1,9                  | 2                        | 0,2 |
| IQR °C                                   | 1,1-2,5              | 1,5-2,4                  |     |
| <b>Children with/without fever (n;%)</b> |                      |                          |     |
| Without fever                            | 20 (83,3%)           | 137 (92,6%)              | 0,1 |
| With fever                               | 4 (16,7%)            | 11 (7,4%)                |     |
| <b>Admission diagnosis (n;%)</b>         |                      |                          |     |
| Fever                                    | 18 (75%)             | 120 (81,1%)              | 0,5 |

|                                                |            |            |     |
|------------------------------------------------|------------|------------|-----|
| Abdominal pain                                 | 3 (12,5%)  | 7 (4,7%)   |     |
| Convulsion                                     | 1 (4,2%)   | 6 (4,1%)   |     |
| Nausea/vomit                                   | 2 (8,3%)   | 5 (3,4%)   |     |
| Headache                                       | 0 (0,0%)   | 3 (2,0%)   |     |
| Dyspnea                                        | 0 (0,0%)   | 3 (2,0%)   |     |
| ORL disorder                                   | 0 (0,0%)   | 1 (0,7%)   |     |
| Ophthalmic disorder                            | 0 (0,0%)   | 1 (0,7%)   |     |
| Suspected PIMS                                 | 0 (0,0%)   | 1 (0,7%)   |     |
| Stomatitis                                     | 0 (0,0%)   | 1 (0,7%)   |     |
| <b>Discharge dimission (n;%)</b>               |            |            |     |
| Viral infection/Infection of the upper airways | 12 (45,8%) | 84 (51,4%) | 0,5 |
| Urinary tract infection                        | 2 (8,3%)   | 15 (10,1%) |     |
| Convulsion                                     | 1 (4,2%)   | 7 (4,7%)   |     |
| Gastroenteritis                                | 2 (13,4%)  | 7 (4,8%)   |     |
| Acute otitis media                             | 1 (4,2%)   | 6 (4,1%)   |     |
| Appendicopathy                                 | 0 (0,0%)   | 4 (2,7%)   |     |
| SARS-CoV-2 infection                           | 2 (8,3%)   | 4 (2,7%)   |     |
| Mesenteric Lymphadenitis                       | 1 (4,2%)   | 3 (2,0%)   |     |
| Stomatis                                       | 0 (0,0%)   | 3 (2,0%)   |     |
| Perianal abscesses                             | 0 (0,0%)   | 2 (1,4%)   |     |
| Abdominal pain                                 | 1 (4,2%)   | 1 (0,7%)   |     |
| Pneumonia                                      | 0 (0,0%)   | 3 (5,1%)   |     |
| PIMS                                           | 0 (0,0%)   | 2 (1,4%)   |     |
| Athralgia                                      | 0 (0,0%)   | 1 (0,7%)   |     |
| Bronchiolitis                                  | 0 (0,0%)   | 1 (0,7%)   |     |
| Heahache                                       | 0 (0,0%)   | 1 (0,7%)   |     |
| Feet cellulitis                                | 0 (0,0%)   | 1 (0,7%)   |     |
| Conjuntivitis                                  | 0 (0,0%)   | 1 (0,7%)   |     |
| Intussusception                                | 0 (0,0%)   | 1 (0,7%)   |     |
| Esophageal duplication                         | 0 (0,0%)   | 1 (0,7%)   |     |

|                                   |            |            |     |
|-----------------------------------|------------|------------|-----|
| Encefalitis                       | 0 (0,0%)   | 1 (0,7%)   |     |
| Stranguria                        | 0 (0,0%)   | 1 (0,7%)   |     |
| <b>Outcome (n;%)</b>              |            |            |     |
| Discharge                         | 15 (62,5%) | 86 (58,1%) | 0,7 |
| Brief intensive observation (BIO) | 5 (20,8%)  | 31 (20,9%) |     |
| Hospitalisation                   | 4 (16,7%)  | 31 (20,9%) |     |

**Appendix 3:** comparison between demographic and clinical characteristics of children with and without fever.

| Characteristic                        | Without fever | With fever | P      |
|---------------------------------------|---------------|------------|--------|
| <b>Age (n;%)</b>                      |               |            |        |
| 0-24                                  | 100 (63,7%)   | 9 (60%)    | 0,8    |
| 25-36                                 | 10 (6,4%)     | 3 (20%)    |        |
| >37                                   | 47 (29,9%)    | 3 (20%)    |        |
| <b>Sex (n; %)</b>                     |               |            |        |
| F                                     | 74 (47,1%)    | 7 (46,7%)  | 0,9    |
| M                                     | 83 (52,9%)    | 8 (53,3%)  |        |
| <b>Ethnic group (n; %)</b>            |               |            |        |
| Caucasian                             | 138 (87,9%)   | 10 (66,7%) | 0,02   |
| Afro-American                         | 5 (3,2%)      | 1 (6,7%)   |        |
| Asian                                 | 5 (3,2%)      | 2 (13,3%)  |        |
| South-American                        | 9 (5,7%)      | 2 (13,2%)  |        |
| <b>Body temperature at T0 (°C)</b>    |               |            |        |
| Median °C                             | 38,7          | 39,9       | <0,001 |
| IQR °C                                | 38,3-38,1     | 39,3-40    |        |
| <b>Body temperature at T60 (°C)</b>   |               |            |        |
| Median °C                             | 36,8          | 38         |        |
| IQR °C                                | 36,3-37,3     | 38-38,3    |        |
| <b>Variation of body temperature</b>  |               |            |        |
| Median °C                             | 2             | 1,5        | 0,012  |
| IQR °C                                | 1,5-2,5       | 1,3-2,0    |        |
| <b>Classes of discomfort T0 (n;%)</b> |               |            |        |
| 0                                     | 0 (0,0%)      | 1 ( 6,7%)  |        |
| 1-4                                   | 2 (1,3%)      | 0 (0.0%)   |        |
| 5-8                                   | 18(11,5%)     | 5 (33,3%)  | 0,02   |
| 9-12                                  | 51 (32,5%)    | 2 (13,3%)  |        |
| >13                                   | 86 (54,8%)    | 7 (46,7%)  | 0,5    |

| <b>Classes of discomfort T60 (n;%)</b>         |             |            |     |
|------------------------------------------------|-------------|------------|-----|
| 0                                              | 34 (21,7%)  | 4 (26,7%)  |     |
| 1-4                                            | 63 (40,1%)  | 6 (40,0%)  | 0,9 |
| 5-8                                            | 36 (22,9%)  | 5 (33,3%)  | 0,4 |
| 9-12                                           | 14 (8,9%)   | 0 (0,0%)   |     |
| >13                                            | 10 (6,4%)   | 0 (0,0%)   |     |
| <b>Admission diagnosis (n:%)</b>               |             |            |     |
| Fever                                          | 124 (78,9%) | 14 (93,3%) | 0,2 |
| Abdominal pain                                 | 9 (5,8%)    | 1 (6,7%)   |     |
| Convulsion                                     | 7 (4,5%)    | 0 (0,0%)   |     |
| Nausea/vomit                                   | 7 (4,4%)    | 0 (0,0%)   |     |
| Headache                                       | 3 (1,9%)    | 0 (0,0%)   |     |
| Dyspnea                                        | 3 (1,9%)    | 0 (0,0%)   |     |
| ORL disorder                                   | 1 (1,9%)    | 0 (0,0%)   |     |
| Ophtalmic disorder                             | 1 (0,6%)    | 0 (0,0%)   |     |
| Suspected PIMS                                 | 1 (0,6%)    | 0 (0,0%)   |     |
| Stomatitis                                     | 1 (0,6%)    | 0 (0,0%)   |     |
| <b>Discharge dimission (n:%)</b>               |             |            |     |
| Viral infection/Infection of the upper airways | 85 (50,8%)  | 10 (70,5%) | 0,3 |
| Urinary tract infection                        | 16 (10,2%)  | 1 (6,7%)   |     |
| Convulsion                                     | 7 (4,5%)    | 1 (6,7%)   |     |
| Gastroenteritis                                | 7 (4,5%)    | 2 (13,4%)  |     |
| Acute otitis media                             | 7 (4,5%)    | 0 (0,0%)   |     |
| Appendicopathy                                 | 6 (3,8%)    | 0 (0,0%)   |     |
| SARS-CoV-2 infection                           | 5 (3,2%)    | 0 (0,0%)   |     |
| Mesenteric Lymphadenitis                       | 3 (1,9%)    | 0 (0,0%)   |     |
| Stomatitis                                     | 2 (1,3%)    | 1 (6,7%)   |     |
| Perianal abscesses                             | 2 (1,3%)    | 0 (0,0%)   |     |
| Abdominal pain                                 | 2 (1,3%)    | 0 (0,0%)   |     |

|                                   |            |           |     |
|-----------------------------------|------------|-----------|-----|
| Pneumonia                         | 8 (1,9%)   | 0 (0,0%)  |     |
| PIMS                              | 2 (1,3%)   | 0 (0,0%)  |     |
| Athralgia                         | 1 (0,6%)   | 0 (0,0%)  |     |
| Bronchiolitis                     | 1 (0,6%)   | 0 (0,0%)  |     |
| Heahache                          | 1 (0,6%)   | 0 (0,0%)  |     |
| Feet cellulitis                   | 1 (0,6%)   | 0 (0,0%)  |     |
| Conjiuntivitis                    | 1 (0,6%)   | 0 (0,0%)  |     |
| Intussusception                   | 1 (0,6%)   | 0 (0,0%)  |     |
| Esophageal duplication            | 1 (0,6%)   | 0 (0,0%)  |     |
| Encefalitis                       | 1 (0,6%)   | 0 (0,0%)  |     |
| Stranguria                        | 1 (0,6%)   | 0 (0,0%)  |     |
| <b>Outcome (n;%)</b>              |            |           |     |
| Discharge                         | 95 (60,5%) | 6 (40,0%) | 0,1 |
| Brief intensive observation (BIO) | 31 (19,7%) | 5 (33,3%) |     |
| Hospitalisation                   | 31 (19,7%) | 4 (26,7%) |     |

**Appendix 4:** correlation between a) altered items at T0 and T60, b) body temperature at T0 and T60, c) altered items and body temperature at T0, d) altered items and body temperature at T60, e) difference between number of altered items at T0 and T60 and temperature difference at T0 and T60.

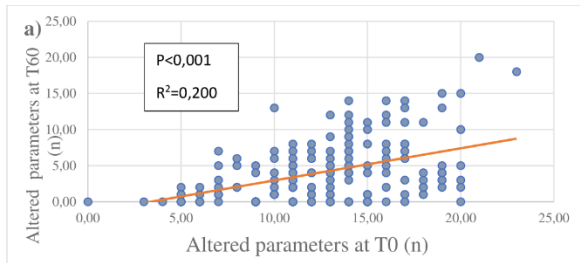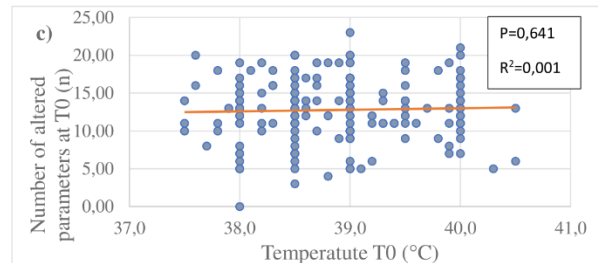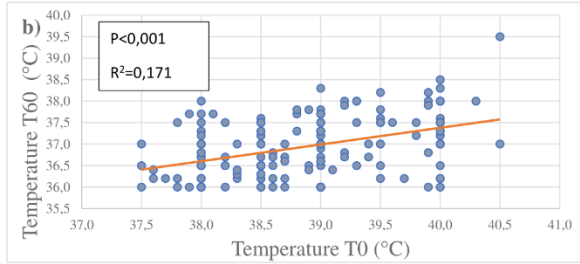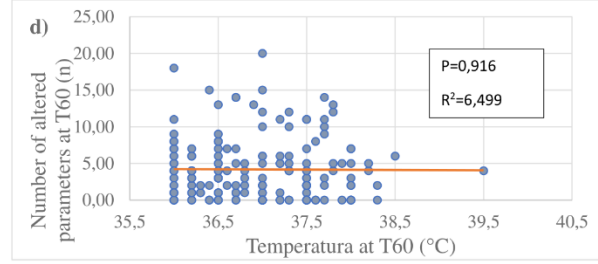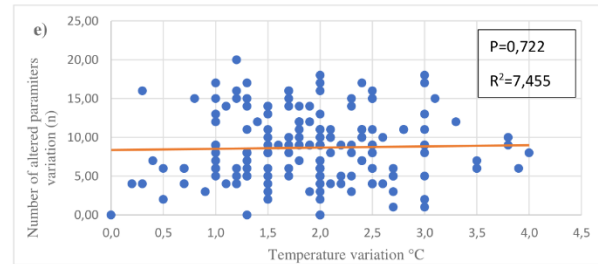



**Appendix 5:** correlation between, a) pain scale and body temperature at T0, b) pain scale and body temperature at T60 c) pain scale at T0 and T60

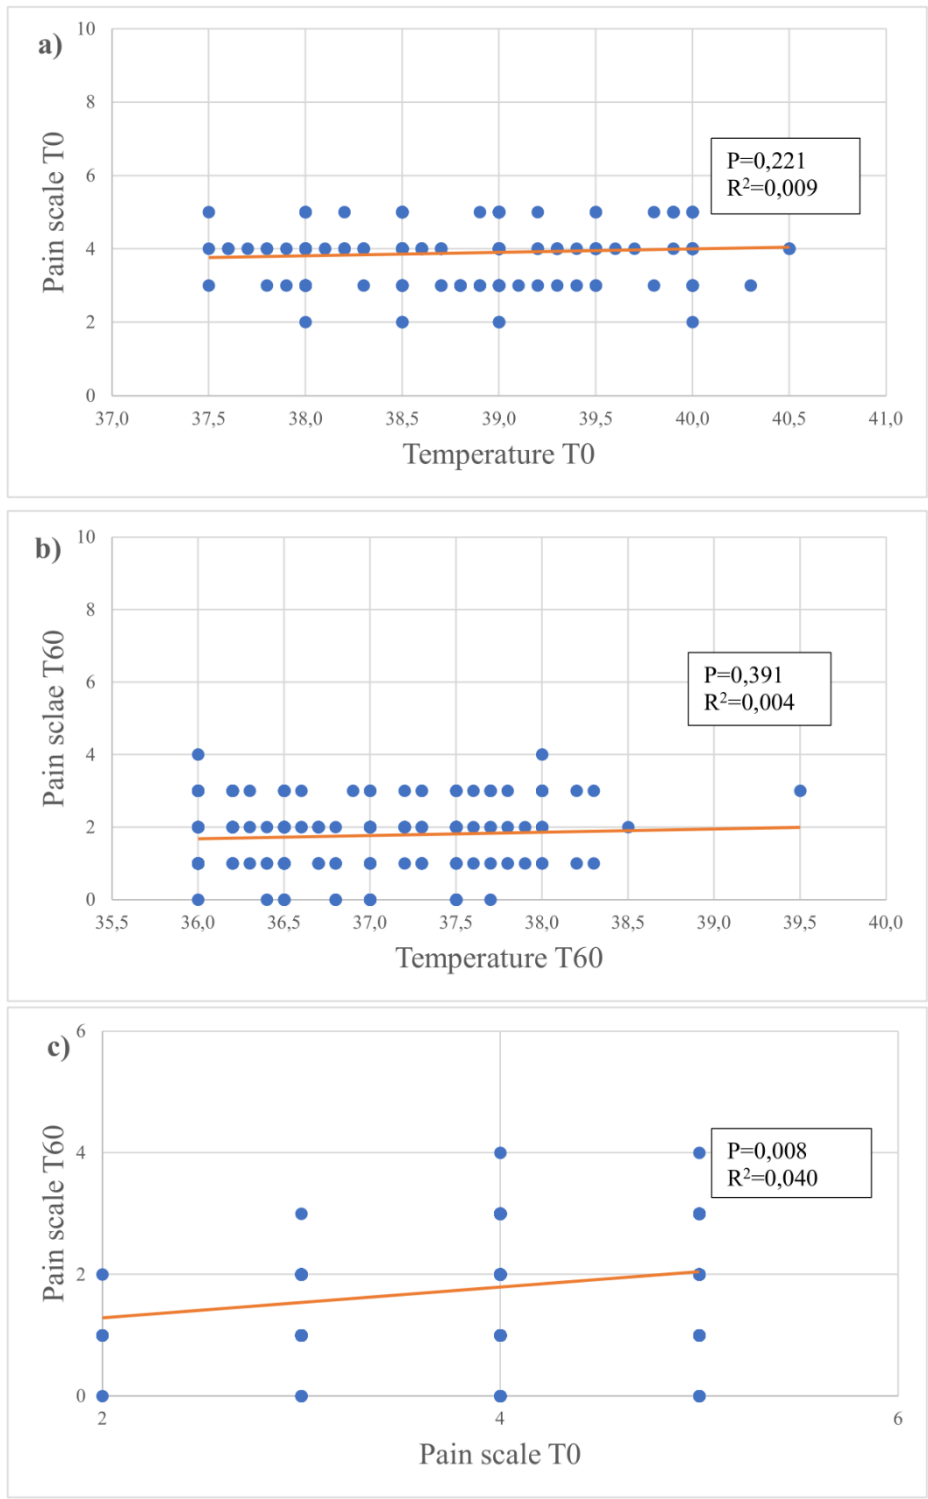

**Appendix 6:** a) correlation between age groups and a) body temperature at T0 and T60, b) level of discomfort (expressed as the number of altered items) at T0 and T60.

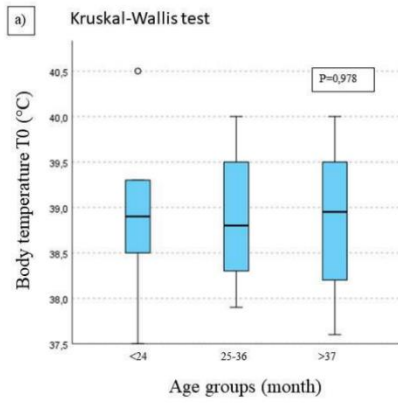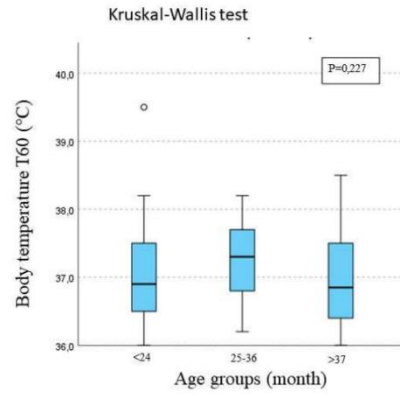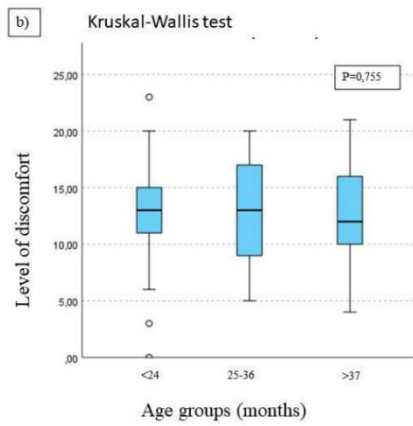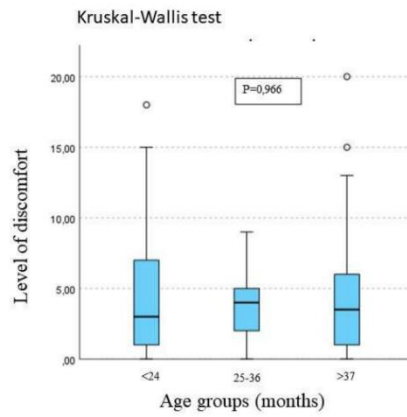

**Appendix 7:** correlation between classes of altered items and body temperature at T0 and T60.

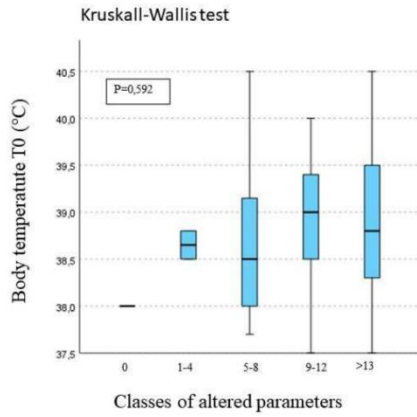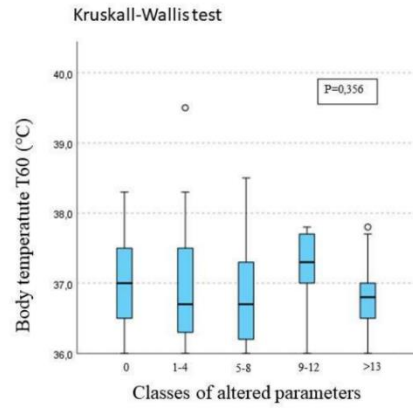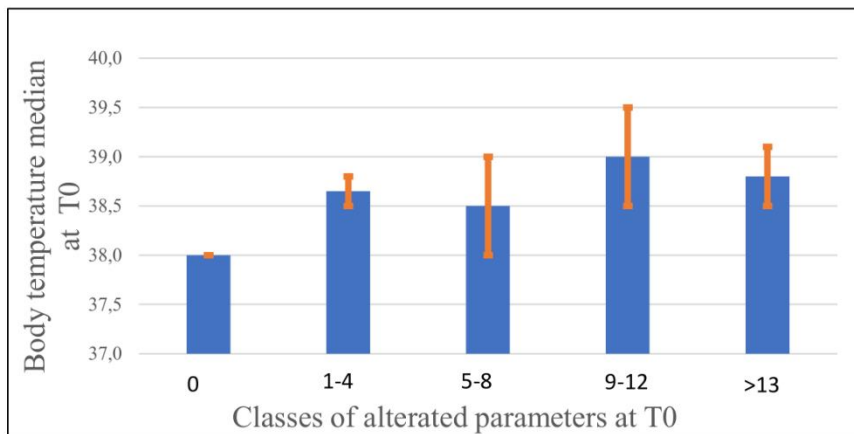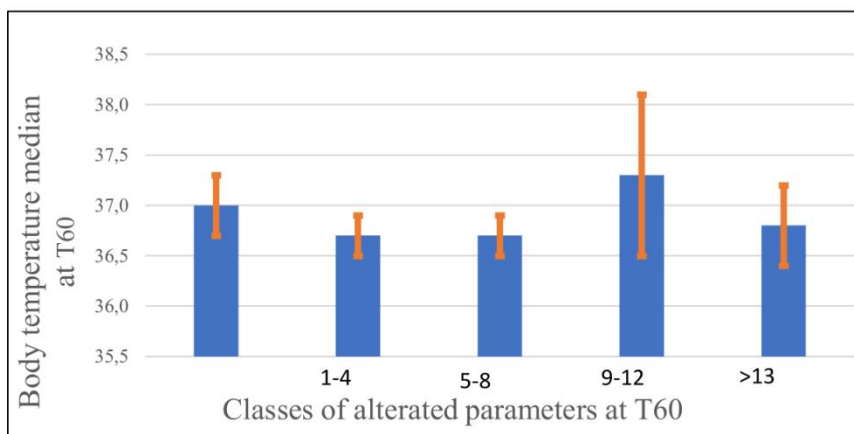

**Appendix 8:** demographic and clinical characteristics of children with SARS-Cov-2 and PIMS infection

| Characteristic                          | Children  |    |
|-----------------------------------------|-----------|----|
| <b>Sex (n; %)</b>                       |           |    |
| M                                       | 3         | 43 |
| F                                       | 4         | 57 |
| <b>Ege (months)</b>                     |           |    |
| 0-24                                    | 6         | 86 |
| 25-36                                   | 0         | 0  |
| >37                                     | 1         | 14 |
| Median                                  | 1         |    |
| IQR                                     | 0,5-3,5   |    |
| <b>Ethnic group (n;%)</b>               |           |    |
| Caucasian                               | 6         | 86 |
| Afro-American                           | 0         | 0  |
| Asian                                   | 1         | 14 |
| South-American                          | 0         | 0  |
| <b>Body temperature at T0 °C</b>        |           |    |
| Median (°C)                             | 38,2      |    |
| IQR (°C)                                | 38,1-38,8 |    |
| <b>Body temperature at T60°C</b>        |           |    |
| Median (°C)                             | 36,5      |    |
| IQR (°C)                                | 36,0-37,4 |    |
| <b>Variation of body temperature °C</b> |           |    |
| Median                                  | 1,8       |    |
| IQR                                     | 1,4-2,3   |    |
| <b>Class of discomfort at T0 (n; %)</b> |           |    |
| 0                                       | 0         | 0  |
| 1-4                                     | 0         | 0  |
| 5-8                                     | 2         | 29 |

|                                          |   |      |
|------------------------------------------|---|------|
| 9-12                                     | 2 | 29   |
| >13                                      | 3 | 43   |
| <b>Class of discomfort at T60 (n; %)</b> |   |      |
| 0                                        | 0 | 0    |
| 1-4                                      | 5 | 71   |
| 5-8                                      | 2 | 29   |
| 9-12                                     | 0 | 0    |
| >13                                      | 0 | 0    |
| <b>Children with/without fever (n;%)</b> |   |      |
| Without fever                            | 7 | 100% |
| With fever                               | 0 | 0%   |
| <b>Admission diagnosis (n; %)</b>        |   |      |
| Fever                                    | 5 | 71   |
| Suspected PIMS                           | 2 | 29   |
| <b>Discharge dimission (n; %)</b>        |   |      |
| PIMS                                     | 2 | 29   |
| Sars-Cov-2 infection                     | 5 | 71   |
| <b>Outcome (n; %)</b>                    |   |      |
| Discharge                                | 2 | 29   |
| Brief intensive observation (BIO)        | 0 | 0    |
| Hospitalisation                          | 5 | 71   |
